# Supplementary material
Source: publisher site journal article supplement (https://www.dovepress.com/get_supplementary_file.php?f=347693.docx)
Supplement: Supplementary file 1 [file get_supplementary_file.php]

Appendix 1

Weekly Discharge Planning Rounds Template

Patient name:

Medical record number:

Attending physician name:

Age:

Admission date:

Admission diagnosis:

Expected length of stay:

Current length of stay:

Estimated discharge date:

Anticipated disposition (home, hospice, acute rehab, long-term care)

Anticipated nursing or equipment needs:

Patient/family education needs:

Family meetings:

Multidisciplinary team meetings:

Pending tests or procedures:

Potential discharge barriers:

Action plan:
